# Supplementary material for: GC-MS, GC-IMS and E-Nose Analysis of Volatile Aroma Compounds in Wet-Marinated Fermented Golden Pomfret Using Different Cooking Methods
Source: Preprints.org preprint supplement (doi:10.20944/preprints202312.1567.v1), 2023-12-21
Supplement: Supplementary file 2 [file Highlights.docx]

Highlights

- Fingerprints of Volatile Compounds of Low-Salt Wet-Marinated Fermented Golden Pomfret with Different Cooking Methods Using GC-MS, GC-IMS and E-nose
- Screening of key characteristic flavour compounds according to OAV, OPLS-DA model and VIP＞1
- The combination of GC-MS and GC-IMS maximised the retention of overall information on the volatile components of low-salt wet-marinated fermented golden pomfret under different cooking methods.
